# Supplementary material
Source: Springer Nature journal article supplement (https://www.springermedizin.de/resource/supplementary/12933_2012_493_MOESM4_ESM.pdf/9538602)

**A**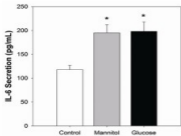**B**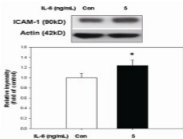**C**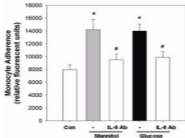

Figure. 3

Supplement: MOESM4 [file 9538602]
